# Supplementary material for: Reference Values for Inward Displacement in the Normal Left Ventricle: A Novel Method of Regional Left Ventricular Function Assessment
Source: MDPI journal article supplement (doi:10.3390/jcdd10120474), 2023-11-24
Supplement: s1 [file s1]

**Figure S1.** Scatterplot showing the correlation between inward displacement and ejection fraction.

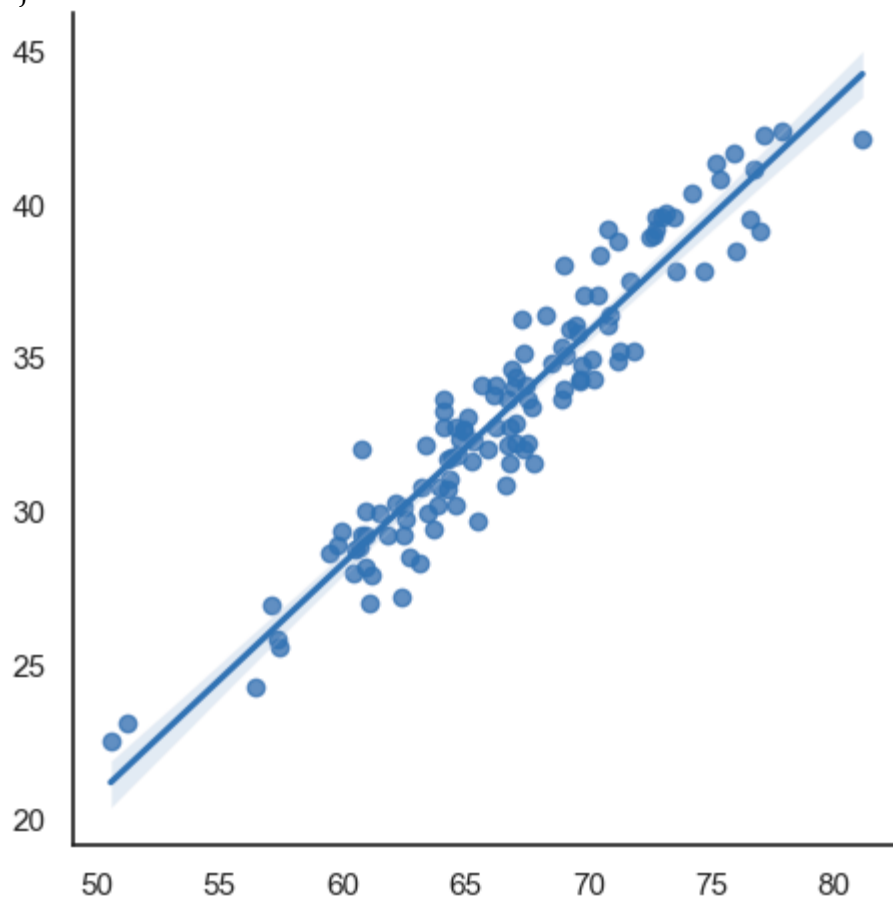

Y-axis, Average Inward Displacement (%). X-axis, Ejection Fraction (%).  $R = 0.95$ ;  $p < 0.0001$ .

**Table S1.** Reference ranges of InD for each of the 17 LV-segments for all age categories

|            | Age  | 21-30 (y) | 31-40 (y) | 41-50 (y) | 51-60 (y) | 61-70 (y) | 71-80 (y) |
|------------|------|-----------|-----------|-----------|-----------|-----------|-----------|
| Segment 1  | mean | 35.5      | 34.9      | 37.3      | 35.6      | 36.8      | 33.6      |
|            | sd   | 5.2       | 6.4       | 3.5       | 4.5       | 7.4       | 5.7       |
| Segment 2  | mean | 27.3      | 27.8      | 29.5      | 28.2      | 30.2      | 24.9      |
|            | sd   | 5.7       | 5.4       | 5.1       | 4.5       | 7.0       | 5.6       |
| Segment 3  | mean | 27.1      | 27.5      | 28.6      | 28.2      | 30.3      | 26.2      |
|            | sd   | 5.7       | 6.2       | 6.3       | 6.3       | 7.0       | 6.6       |
| Segment 4  | mean | 37.6      | 35.0      | 38.4      | 36.8      | 36.9      | 33.4      |
|            | sd   | 5.9       | 6.6       | 6.4       | 5.3       | 5.8       | 5.9       |
| Segment 5  | mean | 30.8      | 32.1      | 35.8      | 33.7      | 34.0      | 31.9      |
|            | sd   | 5.1       | 7.1       | 2.8       | 4.4       | 5.2       | 5.5       |
| Segment 6  | mean | 33.9      | 35.6      | 37.6      | 36.0      | 37.7      | 34.7      |
|            | sd   | 6.0       | 5.4       | 5.3       | 3.8       | 5.2       | 4.4       |
| Segment 7  | mean | 34.4      | 33.4      | 38.7      | 38.1      | 43.7      | 40.2      |
|            | sd   | 6.5       | 10.0      | 8.3       | 7.1       | 7.4       | 7.1       |
| Segment 8  | mean | 29.7      | 31.3      | 34.0      | 34.7      | 42.7      | 35.9      |
|            | sd   | 7.8       | 10.0      | 7.4       | 8.4       | 11.4      | 8.0       |
| Segment 9  | mean | 26.5      | 25.0      | 32.2      | 36.5      | 37.5      | 39.4      |
|            | sd   | 9.2       | 9.7       | 9.6       | 8.2       | 12.6      | 11.0      |
| Segment 10 | mean | 43.1      | 41.8      | 49.3      | 52.3      | 54.3      | 49.8      |
|            | sd   | 10.9      | 11.3      | 14.3      | 11.1      | 10.2      | 12.1      |
| Segment 11 | mean | 33.7      | 36.4      | 38.8      | 34.6      | 37.8      | 37.6      |
|            | sd   | 5.7       | 7.6       | 8.6       | 6.8       | 9.7       | 8.3       |
| Segment 12 | mean | 33.6      | 36.0      | 40.2      | 39.1      | 39.7      | 41.0      |
|            | sd   | 4.6       | 7.7       | 7.5       | 6.0       | 11.7      | 8.6       |
| Segment 13 | mean | 26.6      | 28.3      | 31.7      | 28.4      | 32.5      | 32.0      |

|            |      |      |      |      |      |      |      |
|------------|------|------|------|------|------|------|------|
|            | sd   | 7.9  | 8.0  | 9.0  | 9.9  | 10.3 | 7.2  |
| Segment 14 | mean | 25.7 | 27.4 | 28.2 | 26.9 | 30.5 | 34.0 |
|            | sd   | 13.3 | 8.2  | 11.1 | 12.2 | 10.4 | 10.6 |
| Segment 15 | mean | 27.3 | 26.8 | 30.9 | 29.3 | 34.2 | 34.6 |
|            | sd   | 7.9  | 12.6 | 9.9  | 11.7 | 15.0 | 10.6 |
| Segment 16 | mean | 29.7 | 30.5 | 31.9 | 28.3 | 37.1 | 38.2 |
|            | sd   | 9.5  | 8.5  | 8.9  | 8.4  | 13.2 | 8.2  |
| Segment 17 | mean | 19.0 | 19.3 | 20.9 | 17.7 | 23.7 | 25.4 |
|            | sd   | 8.9  | 6.2  | 8.7  | 8.5  | 9.8  | 7.7  |
| Average    | mean | 30.7 | 31.1 | 34.4 | 33.2 | 36.5 | 34.9 |
|            | sd   | 3.6  | 5.1  | 3.7  | 3.4  | 3.4  | 3.6  |

Values are mean or standard deviation (sd). Abbreviations: InD, inward displacement; LV, left ventricular; sd, standard deviation; y, years.
